# Supplementary material for: Construction of a predictive model for bone metastasis from first primary lung adenocarcinoma within 3 cm based on machine learning algorithm: a retrospective study
Source: PeerJ. 2024 Mar 14;12:e17098. doi: 10.7717/peerj.17098 (PMC10944632; doi:10.7717/peerj.17098)
Supplement: Supplemental Information 1 [file peerj-12-17098-s001.xlsx]

## Sheet: Sheet1
Tumor Location	Marital status	Bone Metastasis	Age(years)	TumorSize(mm)	N Stage	T Stage	Grade	Sex
right upper	Yes	Yes	61	25	2	4	Grade I	Male
right upper	No	No	66	28	2	4	Grade II	Female
left upper	Yes	Yes	38	12	2	4	Grade II	Female
right middle	Yes	No	61	29	0	3	Grade I	Female
right upper	No	Yes	49	28	2	1	Grade III	Female
left upper	No	Yes	76	13	2	4	Grade II	Female
right upper	Yes	No	74	25	0	3	Grade I	Male
right upper	Yes	No	60	20	2	3	Grade III	Male
right upper	No	Yes	60	30	2	2	Grade I	Male
left upper	No	Yes	70	25	0	3	Grade III	Female
right upper	Yes	No	73	28	0	1	Grade I	Female
right upper	Yes	Yes	68	21	2	1	Grade II	Female
right upper	No	No	61	28	2	1	Grade III	Female
right upper	Yes	No	73	28	2	1	Grade I	Male
left upper	Yes	No	51	25	2	4	Grade III	Female
right upper	Yes	No	68	27	2	1	Grade III	Male
right upper	No	No	66	25	0	1	Grade II	Female
right upper	No	Yes	66	25	0	1	Grade II	Female
right upper	Yes	No	60	16	0	1	Grade II	Female
right upper	Yes	No	75	27	0	3	Grade I	Male
right upper	Yes	Yes	60	12	2	1	Grade II	Male
right upper	Yes	No	71	30	0	1	Grade III	Female
right upper	Yes	No	69	30	0	1	Grade II	Female
left upper	Yes	No	64	29	1	1	Grade II	Male
right upper	Yes	No	64	28	0	1	Grade II	Male
right upper	Yes	No	74	28	0	1	Grade II	Female
left lower	Yes	No	66	27	0	1	Grade II	Male
right middle	No	No	72	25	0	1	Grade III	Female
right upper	Yes	No	67	26	2	2	Grade II	Female
left upper	Yes	No	72	28	2	2	Grade III	Male
right upper	Yes	No	70	30	0	1	Grade II	Male
left upper	No	No	72	11	0	1	Grade II	Female
right upper	Yes	No	57	28	2	2	Grade II	Female
left upper	Yes	Yes	64	26	0	1	Grade I	Male
right upper	Yes	No	58	24	0	1	Grade II	Female
right upper	No	No	79	25	0	4	Grade II	Male
right middle	No	No	65	19	0	1	Grade II	Female
right upper	Yes	No	76	24	1	1	Grade II	Female
left lower	Yes	No	69	25	0	1	Grade III	Male
right upper	Yes	Yes	69	20	2	2	Grade II	Female
right upper	Yes	No	60	20	0	1	Grade II	Male
right upper	Yes	Yes	70	25	1	1	Grade III	Male
right upper	Yes	No	69	25	0	1	Grade II	Female
right upper	No	No	68	25	0	1	Grade II	Female
right middle	Yes	No	68	30	0	2	Grade II	Male
right middle	Yes	No	80	21	0	2	Grade III	Male
right middle	Yes	No	59	27	0	1	Grade III	Male
left upper	Yes	No	69	11	2	1	Grade III	Male
right middle	Yes	No	68	18	2	2	Grade II	Female
left lower	Yes	No	60	20	0	2	Grade II	Male
left lower	Yes	No	71	29	0	2	Grade II	Male
right middle	Yes	No	68	16	2	2	Grade II	Male
right lower	Yes	Yes	70	22	0	1	Grade III	Female
right lower	No	No	61	30	0	1	Grade III	Male
right upper	Yes	No	53	22	0	1	Grade II	Female
right upper	No	No	70	25	1	1	Grade II	Male
left upper	No	No	59	25	0	2	Grade II	Female
right upper	Yes	No	63	28	0	2	Grade II	Male
right upper	Yes	No	65	28	0	1	Grade I	Female
right lower	Yes	No	81	23	0	2	Grade II	Female
left lower	No	No	71	21	0	1	Grade II	Female
right upper	No	No	76	25	0	2	Grade II	Female
left lower	Yes	No	80	25	0	1	Grade II	Male
right upper	Yes	No	70	25	0	2	Grade I	Female
left upper	Yes	No	69	23	0	1	Grade III	Male
left lower	No	No	59	14	0	1	Grade IV	Male
right middle	Yes	No	69	20	0	1	Grade II	Female
right upper	No	No	68	20	0	1	Grade II	Female
left upper	Yes	No	66	23	0	1	Grade II	Female
right upper	Yes	No	63	21	0	1	Grade II	Female
left lower	Yes	No	49	16	0	1	Grade II	Female
right middle	Yes	No	49	15	0	1	Grade II	Female
right upper	Yes	No	60	15	1	2	Grade III	Male
right upper	No	No	56	19	0	1	Grade I	Male
left lower	No	No	63	25	0	2	Grade IV	Male
right upper	Yes	No	61	27	0	1	Grade I	Female
left upper	Yes	No	75	15	0	1	Grade I	Female
right upper	Yes	Yes	64	16	0	1	Grade II	Female
right lower	Yes	No	75	15	0	1	Grade II	Female
right lower	Yes	No	69	27	0	2	Grade II	Female
left upper	Yes	No	58	15	0	1	Grade I	Female
right upper	No	No	76	15	0	1	Grade I	Female
left upper	No	No	77	12	0	2	Grade II	Male
left lower	Yes	No	77	14	0	1	Grade II	Male
right upper	Yes	No	66	14	0	1	Grade II	Male
right middle	Yes	No	75	17	0	1	Grade II	Male
right middle	No	No	60	17	0	1	Grade I	Female
left upper	No	No	58	26	0	2	Grade III	Female
right upper	Yes	No	49	20	0	1	Grade I	Male
left lower	No	No	77	17	0	1	Grade I	Female
right lower	Yes	No	66	21	0	1	Grade III	Male
left upper	Yes	No	69	12	0	1	Grade II	Female
right upper	No	No	70	17	0	2	Grade II	Male
right upper	Yes	No	74	15	0	1	Grade II	Male
right upper	Yes	No	44	24	0	3	Grade I	Male
right upper	No	No	65	14	0	1	Grade II	Male
left upper	No	No	71	20	0	1	Grade I	Female
right middle	Yes	No	69	15	0	1	Grade II	Male
left lower	Yes	No	68	15	0	1	Grade II	Male
right upper	Yes	No	67	15	0	1	Grade III	Male
right upper	Yes	No	64	13	0	1	Grade II	Male
left lower	Yes	No	74	10	0	1	Grade III	Male
right middle	No	Yes	80	15	0	1	Grade II	Female
right upper	No	No	78	24	0	1	Grade I	Female
right upper	No	No	80	30	0	2	Grade II	Female
right upper	Yes	No	65	14	0	1	Grade IV	Male
right upper	Yes	No	50	22	0	1	Grade I	Female
right upper	Yes	No	49	20	0	1	Grade I	Female
right upper	Yes	No	70	21	0	1	Grade I	Female
left upper	Yes	No	69	14	0	1	Grade I	Female
left upper	Yes	No	62	12	0	3	Grade III	Male
right upper	No	No	80	12	0	1	Grade III	Female
right upper	No	No	65	11	0	3	Grade III	Male
right upper	Yes	No	70	22	0	1	Grade I	Male
right upper	No	No	65	20	0	1	Grade I	Female
right upper	Yes	No	72	11	0	1	Grade I	Male
right upper	Yes	No	80	11	0	1	Grade II	Female
right upper	Yes	No	61	14	0	1	Grade I	Female
right upper	No	No	66	23	0	1	Grade I	Female
right upper	Yes	No	64	12	0	1	Grade II	Male
right upper	No	No	66	17	0	1	Grade I	Male
left lower	Yes	No	61	8	0	1	Grade I	Female
right upper	Yes	No	64	16	0	1	Grade I	Male
right middle	Yes	No	62	15	0	1	Grade I	Male
right upper	Yes	No	70	10	0	1	Grade I	Male
